# Supplementary material
Source: PubMed Central journal article supplement (PMC1815283)
Supplement: pnas_0607077104_2.pdf [file pnas_0607077104_2.pdf]

**Table 3. Distribution of 2,038 16S rDNA clones from six subjects**

| Subject      |           |     | No. of clones studied |               |              |                 |               |            |                     |
|--------------|-----------|-----|-----------------------|---------------|--------------|-----------------|---------------|------------|---------------------|
|              |           |     | First sampling        |               |              | Second sampling |               |            |                     |
| Designation  | Age, yr   | Sex | Left forearm          | Right forearm | Total        | Left forearm    | Right forearm | Total      | No. of months apart |
| A            | 41        | F   | 105                   | 103           | 208          | 100             | 103           | 203        | 10                  |
| B            | 21        | F   | 103                   | 101           | 204          | NA*             | NA*           | NA*        | NA*                 |
| C            | 31        | F   | 103                   | 99            | 202          | 101             | 105           | 206        | 8                   |
| D            | 53        | M   | 101                   | 103           | 204          | NA*             | NA*           | NA*        | NA*                 |
| E            | 54        | M   | 100                   | 103           | 203          | 103             | 99            | 202        | 10                  |
| F            | 29        | M   | 102                   | 98            | 200          | 102             | 104           | 206        | 8                   |
| Mean ± SD    | 38.2±13.5 |     | 102.3                 | 101.2         | 203.5±2.7    | 101.5           | 102.8         | 204.2±2.1  |                     |
| <b>Total</b> |           |     | <b>614</b>            | <b>607</b>    | <b>1,221</b> | <b>406</b>      | <b>411</b>    | <b>817</b> |                     |

\*NA, not applicable.
