# Supplementary material
Source: PubMed Central journal article supplement (PMC1815283)
Supplement: pnas_0607077104_3.pdf [file pnas_0607077104_3.pdf]

**Table 4. Representation of 182 bacterial SLOTU in normal forearm skin from 6 subjects**

|         |                                           | Number of clones |         |         |         |         |         |             |           |          |
|---------|-------------------------------------------|------------------|---------|---------|---------|---------|---------|-------------|-----------|----------|
| Species |                                           | SubA             | SubB    | SubC    | SubD    | SubE    | SubF    | All Females | All Males | Total    |
|         |                                           | (n=208)          | (n=204) | (n=202) | (n=204) | (n=203) | (n=200) | (n=614)     | (n=607)   | (n=1221) |
|         | <i>Acidovorax temperans</i>               |                  |         |         |         | 1       |         |             | 1         | 1        |
|         | <i>Acinetobacter haemolyticus</i>         |                  |         |         | 9       |         |         |             | 9         | 9        |
|         | <i>Acinetobacter johnsonii</i>            |                  |         |         | 1       |         |         |             | 1         | 1        |
|         | <i>Acinetobacter junii</i>                | 3                | 10      | 13      |         | 1       | 3       | 26          | 4         | 30       |
|         | <i>Acinetobacter ursingii</i>             |                  | 4       | 1       |         |         |         | 5           |           | 5        |
|         | <i>Actinomyces naeslundii</i>             | 1                |         | 3       |         |         |         | 4           |           | 4        |
|         | <i>Actinomyces neuii</i>                  |                  |         |         |         | 3       | 4       |             | 7         | 7        |
|         | <i>Anaerococcus prevotii</i>              |                  | 2       |         |         |         |         | 2           |           | 2        |
|         | <i>Atopobium vaginae</i>                  | 2                |         |         | 1       |         |         | 2           | 1         | 3        |
|         | <i>Brevibacterium paucivorans</i>         |                  |         |         | 3       |         |         |             | 3         | 3        |
|         | <i>Brevundimonas aurantiaca</i>           | 2                |         |         |         |         |         | 2           |           | 2        |
|         | <i>Brevundimonas vesicularis</i>          | 1                |         |         |         |         |         | 1           |           | 1        |
|         | <i>Candidatus Nostocoida limicola</i>     | 1                |         |         |         |         |         | 1           |           | 1        |
|         | <i>Corynebacterium accolens</i>           |                  |         |         |         | 2       |         |             | 2         | 2        |
|         | <i>Corynebacterium afermentans</i>        |                  |         |         | 3       | 1       |         |             | 4         | 4        |
|         | <i>Corynebacterium amycolatum</i>         |                  | 2       | 18      | 2       | 1       |         | 20          | 3         | 23       |
|         | <i>Corynebacterium appendicis</i>         |                  |         |         | 2       | 3       | 2       |             | 7         | 7        |
|         | <i>Corynebacterium aurimucosum</i>        |                  |         |         | 3       |         |         |             | 3         | 3        |
|         | <i>Corynebacterium coyleae</i>            |                  | 1       |         |         |         | 1       | 1           | 1         | 2        |
|         | <i>Corynebacterium durum</i>              |                  |         | 3       |         |         |         | 3           |           | 3        |
|         | <i>Corynebacterium glaucum</i>            |                  |         |         |         | 1       |         |             | 1         | 1        |
|         | <i>Corynebacterium glucuronolyticum</i>   |                  |         |         |         | 3       | 3       |             | 6         | 6        |
|         | <i>Corynebacterium imitans</i>            |                  |         | 8       | 1       |         |         | 8           | 1         | 9        |
|         | <i>Corynebacterium jeikeium</i>           |                  | 1       | 1       | 11      |         | 1       | 2           | 12        | 14       |
|         | <i>Corynebacterium kroppenstedtii</i>     |                  |         |         |         | 10      |         |             | 10        | 10       |
|         | <i>Corynebacterium lipophiloflavum</i>    |                  |         | 1       |         | 1       |         | 1           | 1         | 2        |
|         | <i>Corynebacterium matruchotii</i>        |                  |         |         | 2       |         |         |             | 2         | 2        |
|         | <i>Corynebacterium minutissimum</i>       |                  |         |         | 5       | 1       |         |             | 6         | 6        |
|         | <i>Corynebacterium mucifaciens</i>        |                  | 8       |         | 14      | 6       | 1       | 8           | 21        | 29       |
|         | <i>Corynebacterium nigricans</i>          |                  |         | 1       | 5       |         |         | 1           | 5         | 6        |
|         | <i>Corynebacterium pseudodiphthericum</i> |                  |         |         | 1       |         |         |             | 1         | 1        |
|         | <i>Corynebacterium simulans</i>           |                  |         |         | 5       |         | 3       |             | 8         | 8        |
|         | <i>Corynebacterium singulare</i>          |                  |         |         | 3       | 1       | 1       |             | 5         | 5        |

|         |  |                                            | Number of clones |         |         |         |         |         |             |           |          |
|---------|--|--------------------------------------------|------------------|---------|---------|---------|---------|---------|-------------|-----------|----------|
| Species |  |                                            | SubA             | SubB    | SubC    | SubD    | SubE    | SubF    | All Females | All Males | Total    |
|         |  |                                            | (n=208)          | (n=204) | (n=202) | (n=204) | (n=203) | (n=200) | (n=614)     | (n=607)   | (n=1221) |
|         |  | <i>Corynebacterium sundsvallense</i>       |                  |         | 1       | 2       |         |         | 1           | 2         | 3        |
|         |  | <i>Corynebacterium tuberculostearicum</i>  | 3                | 3       | 19      | 29      | 11      | 13      | 25          | 53        | 78       |
|         |  | <i>Diaphorobacter nitroreducens</i>        | 1                | 2       | 2       |         | 2       |         | 5           | 2         | 7        |
|         |  | <i>Enhydrobacter aerosaccus</i>            | 9                | 10      | 15      |         |         |         | 34          |           | 34       |
|         |  | <i>Enterobacter asburiae</i>               |                  |         | 1       |         |         |         | 1           |           | 1        |
|         |  | <i>Enterococcus faecalis</i>               |                  |         | 2       |         |         |         | 2           |           | 2        |
|         |  | <i>Eremococcus coleocola</i>               |                  |         |         | 1       |         |         |             | 1         | 1        |
|         |  | <i>Facklamia hominis</i>                   |                  |         |         | 5       |         |         |             | 5         | 5        |
|         |  | <i>Facklamia languida</i>                  |                  |         |         |         | 2       |         |             | 2         | 2        |
|         |  | <i>Gardnerella vaginalis</i>               |                  |         | 3       |         |         |         | 3           |           | 3        |
|         |  | <i>Gemella haemolysans</i>                 |                  |         |         |         | 1       |         |             | 1         | 1        |
|         |  | <i>Gemella morbillorum</i>                 |                  |         |         |         | 1       |         |             | 1         | 1        |
|         |  | <i>Gemella sanguinis</i>                   |                  |         |         | 1       |         |         |             | 1         | 1        |
|         |  | <i>Gordonia bronchialis</i>                | 4                |         |         |         |         |         | 4           |           | 4        |
|         |  | <i>Gordonia sputi</i>                      | 4                |         |         |         |         |         | 4           |           | 4        |
|         |  | <i>Gordonia terrae</i>                     | 3                |         |         |         |         |         | 3           |           | 3        |
|         |  | <i>Granulicatella elegans</i>              |                  | 3       |         |         |         |         | 3           |           | 3        |
|         |  | <i>Hyphomicrobium facile</i>               |                  |         | 1       |         |         |         | 1           |           | 1        |
|         |  | <i>Janibacter melonis</i>                  | 1                |         |         |         |         |         | 1           |           | 1        |
|         |  | <i>Kocuria marina</i>                      | 1                |         |         |         |         |         | 1           |           | 1        |
|         |  | <i>Kocuria palustris</i>                   | 1                |         | 1       |         |         |         | 2           |           | 2        |
|         |  | <i>Kocuria rhizophila</i>                  |                  | 3       | 5       |         |         |         | 8           |           | 8        |
|         |  | <i>Lactobacillus crispatus</i>             |                  | 9       |         |         |         |         | 9           |           | 9        |
|         |  | <i>Lactobacillus jensenii</i>              |                  |         | 3       |         |         |         | 3           |           | 3        |
|         |  | <i>Lactobacillus sp.</i>                   |                  |         |         |         | 2       |         |             | 2         | 2        |
|         |  | <i>Leuconostoc argentinum</i>              |                  |         | 1       |         |         |         | 1           |           | 1        |
|         |  | <i>Methylobacterium extorquens</i>         | 1                |         |         |         |         |         | 1           |           | 1        |
|         |  | <i>Methylobacterium mesophilicum</i>       | 1                |         |         |         |         |         | 1           |           | 1        |
|         |  | <i>Micrococcus luteus</i>                  |                  | 5       |         |         |         | 1       | 5           | 1         | 6        |
|         |  | <i>Microlunatus phosphovorus</i>           |                  |         |         | 1       |         |         |             | 1         | 1        |
|         |  | <i>Mobiluncus curtisii subsp. holmesii</i> | 1                |         |         |         |         |         | 1           |           | 1        |
|         |  | <i>Mycobacterium chlorophenolicum</i>      | 1                |         |         |         |         |         | 1           |           | 1        |
|         |  | <i>Mycobacterium obuense</i>               | 2                |         |         |         |         |         | 2           |           | 2        |
|         |  | <i>Nakamurella multipartita</i>            | 2                |         |         |         |         |         | 2           |           | 2        |
|         |  | <i>Pedomicrobium australicum</i>           |                  | 4       |         |         |         |         | 4           |           | 4        |
|         |  | <i>Peptoniphilus harei</i>                 |                  |         | 1       |         | 2       |         | 1           | 2         | 3        |

|         |  |                                             | Number of clones |         |         |         |         |         |             |           |          |
|---------|--|---------------------------------------------|------------------|---------|---------|---------|---------|---------|-------------|-----------|----------|
| Species |  |                                             | SubA             | SubB    | SubC    | SubD    | SubE    | SubF    | All Females | All Males | Total    |
|         |  |                                             | (n=208)          | (n=204) | (n=202) | (n=204) | (n=203) | (n=200) | (n=614)     | (n=607)   | (n=1221) |
|         |  | <i>Peptostreptococcus anaerobius</i>        |                  |         |         | 1       |         |         |             | 1         | 1        |
|         |  | <i>Prevotella bivia</i>                     |                  |         |         | 1       |         |         |             | 1         | 1        |
|         |  | <i>Prevotella corporis</i>                  |                  |         |         | 1       |         |         |             | 1         | 1        |
|         |  | <i>Prevotella disiens</i>                   | 1                |         |         |         | 1       |         | 1           | 1         | 2        |
|         |  | <i>Prevotella melaninogenica</i>            |                  |         |         |         | 3       |         |             | 3         | 3        |
|         |  | <i>Propionibacterium acnes</i>              | 22               | 25      | 25      | 28      | 42      | 110     | 72          | 180       | 252      |
|         |  | <i>Propionibacterium granulosum</i>         |                  |         |         | 2       | 5       | 3       |             | 10        | 10       |
|         |  | <i>Pseudomonas aeruginosa</i>               |                  | 3       |         |         | 2       |         | 3           | 2         | 5        |
|         |  | <i>Pseudomonas saccharophila</i>            |                  | 10      | 1       |         | 1       |         | 11          | 1         | 12       |
|         |  | <i>Pseudomonas stutzeri</i>                 |                  | 11      | 5       |         | 4       | 1       | 16          | 5         | 21       |
|         |  | <i>Pseudomonas tremae</i>                   |                  | 3       |         |         |         |         | 3           |           | 3        |
|         |  | <i>Rhodococcus corynebacterioides</i>       | 7                |         |         |         |         |         | 7           |           | 7        |
|         |  | <i>Rhodococcus erythropolis</i>             | 5                |         |         |         |         |         | 5           |           | 5        |
|         |  | <i>Rothia aeria</i>                         | 1                |         |         |         |         |         | 1           |           | 1        |
|         |  | <i>Rothia dentocariosa</i>                  |                  |         | 1       |         |         |         | 1           |           | 1        |
|         |  | <i>Rothia mucilaginoso</i>                  | 10               |         |         | 3       | 4       | 1       | 10          | 8         | 18       |
|         |  | <i>Rothia nasimurium</i>                    | 2                |         |         |         |         |         | 2           |           | 2        |
|         |  | <i>Serratia liquefaciens</i>                |                  | 4       |         |         |         |         | 4           |           | 4        |
|         |  | <i>Serratia marcescens subsp. sakuensis</i> |                  |         |         |         | 2       |         |             | 2         | 2        |
|         |  | <i>Sphingobium amiens</i>                   | 1                |         |         |         |         | 1       | 1           | 1         | 2        |
|         |  | <i>Staphylococcus capitis</i>               |                  |         | 3       | 2       | 8       |         | 3           | 10        | 13       |
|         |  | <i>Staphylococcus caprae</i>                | 5                |         | 5       | 17      | 16      |         | 10          | 33        | 43       |
|         |  | <i>Staphylococcus cohnii</i>                | 1                |         |         |         |         |         | 1           |           | 1        |
|         |  | <i>Staphylococcus epidermidis</i>           |                  | 1       | 10      | 11      | 4       | 10      | 11          | 25        | 36       |
|         |  | <i>Staphylococcus haemolyticus</i>          |                  |         |         |         |         | 2       |             | 2         | 2        |
|         |  | <i>Staphylococcus hominis</i>               | 1                | 1       | 5       | 6       |         | 7       | 7           | 13        | 20       |
|         |  | <i>Staphylococcus saccharolyticus</i>       |                  | 2       |         | 1       | 4       |         | 2           | 5         | 7        |
|         |  | <i>Staphylococcus warneri</i>               |                  | 2       | 11      | 1       |         |         | 13          | 1         | 14       |
|         |  | <i>Stenotrophomonas maltophilia</i>         |                  |         |         |         | 1       |         |             | 1         | 1        |
|         |  | <i>Streptococcus agalactiae</i>             | 1                |         |         |         |         |         | 1           |           | 1        |
|         |  | <i>Streptococcus cristatus</i>              |                  |         |         |         | 2       |         |             | 2         | 2        |
|         |  | <i>Streptococcus gordonii</i>               | 1                |         |         |         |         |         | 1           |           | 1        |
|         |  | <i>Streptococcus infantis</i>               |                  |         |         |         | 2       |         |             | 2         | 2        |
|         |  | <i>Streptococcus intermedius</i>            | 1                |         |         |         |         |         | 1           |           | 1        |
|         |  | <i>Streptococcus mitis</i>                  | 4                | 11      | 1       | 1       | 12      | 4       | 16          | 17        | 33       |
|         |  | <i>Streptococcus parasanguinis</i>          | 2                |         |         |         |         |         | 2           |           | 2        |

|                                   |                                |                                     | Number of clones |            |            |            |            |            |             |            |             |   |
|-----------------------------------|--------------------------------|-------------------------------------|------------------|------------|------------|------------|------------|------------|-------------|------------|-------------|---|
| Species                           |                                |                                     | SubA             | SubB       | SubC       | SubD       | SubE       | SubF       | All Females | All Males  | Total       |   |
|                                   |                                |                                     | (n=208)          | (n=204)    | (n=202)    | (n=204)    | (n=203)    | (n=200)    | (n=614)     | (n=607)    | (n=1221)    |   |
|                                   |                                | <i>Streptococcus salivarius</i>     |                  |            | 3          |            | 6          | 1          | 3           | 7          | 10          |   |
|                                   |                                | <i>Streptococcus sanguinis</i>      | 7                | 1          | 8          | 3          |            |            | 16          | 3          | 19          |   |
|                                   |                                | <i>Tetrasphaera elongata</i>        | 1                |            |            |            |            |            |             | 1          |             | 1 |
|                                   |                                | <i>Tsukamurella tyrosinosolvans</i> | 3                |            |            |            |            |            |             | 3          |             | 3 |
|                                   |                                | <i>Veillonella dispar</i>           |                  |            |            | 1          |            | 1          |             |            | 2           | 2 |
|                                   |                                | <i>Veillonella parvula</i>          | 1                |            |            |            |            |            |             | 1          |             | 1 |
|                                   |                                | <b>Subtotal</b>                     | <b>122</b>       | <b>141</b> | <b>182</b> | <b>189</b> | <b>175</b> | <b>174</b> | <b>445</b>  | <b>538</b> | <b>983</b>  |   |
| Cultivated non-type strains(n=20) |                                | <i>Acidovorax AM084006</i>          |                  | 2          |            |            | 1          | 1          | 2           | 2          | 4           |   |
|                                   |                                | <i>Bradyrhizobiaceae U87763</i>     |                  | 2          |            |            |            |            | 2           |            | 2           |   |
|                                   |                                | <i>Carnobacterium AJ427446</i>      |                  | 10         |            |            |            |            | 10          |            | 10          |   |
|                                   |                                | <i>Corynebacterium AY581888</i>     |                  |            |            | 2          |            |            |             | 2          | 2           |   |
|                                   |                                | <i>Corynebacterium AF543288</i>     |                  |            |            |            | 1          |            |             | 1          | 1           |   |
|                                   |                                | <i>Corynebacterium X81872</i>       |                  |            | 1          |            |            |            | 1           |            | 1           |   |
|                                   |                                | <i>Corynebacterium X84253</i>       |                  |            |            |            | 1          |            |             | 1          | 1           |   |
|                                   |                                | <i>Dermacoccus AF409025</i>         |                  |            | 1          |            |            |            | 1           |            | 1           |   |
|                                   |                                | <i>Finegoldia AB109769</i>          | 2                | 6          | 1          | 2          | 3          | 2          | 9           | 7          | 16          |   |
|                                   |                                | <i>Haemophilus AF224309</i>         |                  |            | 2          |            |            |            | 2           |            | 2           |   |
|                                   |                                | <i>Methylobacterium AY741717</i>    | 1                |            |            |            |            |            | 1           |            | 1           |   |
|                                   |                                | <i>Neisseria DQ409137</i>           | 1                |            |            |            |            |            | 1           |            | 1           |   |
|                                   |                                | <i>Pasteurellaceae AJ290758</i>     |                  |            |            |            | 1          |            |             | 1          | 1           |   |
|                                   |                                | <i>Propionibacterium Y17821</i>     |                  |            |            |            |            | 6          |             | 6          | 6           |   |
|                                   |                                | <i>Prevotella AY207061</i>          |                  |            |            |            |            | 1          |             | 1          | 1           |   |
|                                   |                                | <i>Prevotella AY323525</i>          |                  |            |            |            | 1          |            |             | 1          | 1           |   |
|                                   |                                | <i>Pseudomonas AF326380</i>         |                  |            |            |            |            | 1          |             | 1          | 1           |   |
|                                   |                                | <i>Pseudomonas AJ575816</i>         |                  | 2          | 1          |            |            |            | 3           |            | 3           |   |
|                                   |                                | <i>Sphingopyxis AY328823</i>        | 2                |            |            |            |            |            | 2           |            | 2           |   |
|                                   | <i>Zimmermannella AJ251780</i> |                                     |                  |            | 1          |            |            |            | 1           | 1          |             |   |
|                                   | <b>Subtotal</b>                | <b>6</b>                            | <b>22</b>        | <b>6</b>   | <b>5</b>   | <b>8</b>   | <b>11</b>  | <b>34</b>  | <b>24</b>   | <b>58</b>  |             |   |
| <b>Subtotal</b>                   |                                |                                     | <b>128</b>       | <b>163</b> | <b>188</b> | <b>194</b> | <b>183</b> | <b>185</b> | <b>479</b>  | <b>562</b> | <b>1041</b> |   |
|                                   |                                | <i>Actinomyces AF385553</i>         |                  |            | 1          |            |            |            | 1           |            | 1           |   |
|                                   |                                | <i>Actinomycetales AY770698</i>     | 4                |            | 2          |            | 7          | 6          | 6           | 13         | 19          |   |
|                                   |                                | <i>Anaerococcus AY959168</i>        | 2                |            |            |            |            | 4          | 2           | 4          | 6           |   |
|                                   |                                | <i>Anaerococcus AY958800</i>        |                  |            |            | 1          |            |            |             | 1          | 1           |   |
|                                   |                                | <i>Anaerococcus AY981208</i>        |                  |            |            |            | 1          |            |             | 1          | 1           |   |

|         |  |                                        | Number of clones |           |          |          |           |           |             |           |           |
|---------|--|----------------------------------------|------------------|-----------|----------|----------|-----------|-----------|-------------|-----------|-----------|
| Species |  |                                        | SubA             | SubB      | SubC     | SubD     | SubE      | SubF      | All Females | All Males | Total     |
|         |  |                                        | (n=208)          | (n=204)   | (n=202)  | (n=204)  | (n=203)   | (n=200)   | (n=614)     | (n=607)   | (n=1221)  |
|         |  | <i>Aquabacterium</i> AB128892          |                  |           | 2        |          |           |           | 2           |           | 2         |
|         |  | <i>Bacteria</i> AJ619064               | 8                |           |          |          |           |           | 8           |           | 8         |
|         |  | <i>Bacteroidales</i> AF385513          |                  |           |          |          | 2         |           |             | 2         | 2         |
|         |  | <i>Betaproteobacteria</i> AY360547     |                  | 3         |          |          |           |           | 3           |           | 3         |
|         |  | <i>Burkholderiales</i> DQ016727        | 1                | 3         |          |          |           |           | 4           |           | 4         |
|         |  | <i>Caulobacteraceae</i> AJ459874       |                  |           |          |          | 1         |           |             | 1         | 1         |
|         |  | <i>Flavobacteriaceae</i> AF502204      | 1                |           |          |          |           |           | 1           |           | 1         |
|         |  | <i>Gammaproteobacteria</i> AY922146    |                  |           |          |          |           | 1         |             | 1         | 1         |
|         |  | <i>Haemophilus</i> AY975706            | 1                | 2         |          |          |           | 2         | 3           | 2         | 5         |
|         |  | <i>Methylobacterium</i> AY592150       | 1                |           |          |          |           |           | 1           |           | 1         |
|         |  | <i>Neisseriaceae</i> AY225604          |                  | 17        |          |          | 1         |           | 17          | 1         | 18        |
|         |  | <i>Paracoccus</i> AJ619068             | 1                |           |          |          |           |           | 1           |           | 1         |
|         |  | <i>Pasteurellaceae</i> AY005034        |                  |           |          |          | 1         |           |             | 1         | 1         |
|         |  | <i>Porphyromonas</i> AY008313          |                  |           |          | 1        |           |           |             | 1         | 1         |
|         |  | <i>Rhizobiales</i> AF358012            |                  |           | 1        |          |           |           | 1           |           | 1         |
|         |  | <i>Selenomonas</i> AY349404            |                  |           |          |          | 4         |           |             | 4         | 4         |
|         |  | <b>Subtotal</b>                        | <b>19</b>        | <b>25</b> | <b>6</b> | <b>2</b> | <b>17</b> | <b>13</b> | <b>50</b>   | <b>32</b> | <b>82</b> |
|         |  | <i>Acidaminococcaceae</i> AF481209 93% |                  |           |          | 2        |           |           |             | 2         | 2         |
|         |  | <i>Alkanindiges</i> AF513979 93%       |                  | 5         |          |          |           |           | 5           |           | 5         |
|         |  | <i>Amaricoccus</i> Y09610 94%          | 1                |           |          |          |           |           | 1           |           | 1         |
|         |  | <i>Anaerococcus</i> Y07841 95%         |                  |           |          | 1        |           |           |             | 1         | 1         |
|         |  | <i>Bdellovibrio</i> AF148938 88%       |                  |           | 4        |          |           |           | 4           |           | 4         |
|         |  | <i>Blastococcus</i> AY234675 91%       | 2                |           |          |          |           |           | 2           |           | 2         |
|         |  | <i>Burkholderiales</i> AJ412678 96%    | 4                |           |          |          |           |           | 4           |           | 4         |
|         |  | <i>Chitinophaga</i> AJ318177 88%       | 1                |           |          |          |           |           | 1           |           | 1         |
|         |  | <i>Corynebacterium</i> AF537601 96%    |                  |           |          |          |           | 2         |             | 2         | 2         |
|         |  | <i>Corynebacterium</i> AJ439345 95%    |                  |           |          | 1        |           |           |             | 1         | 1         |
|         |  | <i>Cyanobacteria</i> AJ538357 83%      |                  |           | 2        |          |           |           | 2           |           | 2         |
|         |  | <i>Deinococcus</i> AE002076 91%        | 2                |           |          |          |           |           | 2           |           | 2         |
|         |  | <i>Deinococcus</i> AJ549111 91%        | 29               |           |          |          |           |           | 29          |           | 29        |
|         |  | <i>Deinococcus</i> Y11329 90%          | 4                |           |          |          |           |           | 4           |           | 4         |
|         |  | <i>Dermacoccus</i> AF409025 95%        | 9                |           |          |          |           |           | 9           |           | 9         |

|                                                                    |  |                                      | Number of clones |            |            |            |            |            |             |            |             |
|--------------------------------------------------------------------|--|--------------------------------------|------------------|------------|------------|------------|------------|------------|-------------|------------|-------------|
| Species                                                            |  |                                      | SubA             | SubB       | SubC       | SubD       | SubE       | SubF       | All Females | All Males  | Total       |
|                                                                    |  |                                      | (n=208)          | (n=204)    | (n=202)    | (n=204)    | (n=203)    | (n=200)    | (n=614)     | (n=607)    | (n=1221)    |
|                                                                    |  | <i>Flexibacteraceae</i> AY279982 87% | 1                |            |            |            |            |            | 1           |            | 1           |
|                                                                    |  | <i>Hymenobacter</i> D84607 93%       |                  |            |            |            | 2          |            |             | 2          | 2           |
|                                                                    |  | <i>Mesorhizobium</i> AP003001 95%    | 1                |            |            |            |            |            | 1           |            | 1           |
|                                                                    |  | <i>Methylobacillus</i> AF289159 94%  |                  | 7          |            |            |            |            | 7           |            | 7           |
|                                                                    |  | <i>Paracraurococcus</i> AF443585 93% |                  |            |            | 1          |            |            |             | 1          | 1           |
|                                                                    |  | <i>Paracraurococcus</i> AF443585 95% | 2                |            |            |            |            |            | 2           |            | 2           |
|                                                                    |  | <i>Peptoniphilus</i> Y07840 93%      |                  |            |            | 1          |            |            |             | 1          | 1           |
|                                                                    |  | <i>Porphyromonas</i> L16493 86%      |                  |            |            | 1          |            |            |             | 1          | 1           |
|                                                                    |  | <i>Prevotella</i> L16476 93%         |                  |            |            | 1          |            |            |             | 1          | 1           |
|                                                                    |  | <i>Pseudomonas</i> AY379974 96%      |                  | 4          |            |            |            |            | 4           |            | 4           |
|                                                                    |  | <i>Rhizobiales</i> AB121772 96%      |                  |            | 2          |            |            |            | 2           |            | 2           |
|                                                                    |  | <i>Bacteria</i> AJ619064 87%         | 1                |            |            |            |            |            | 1           |            | 1           |
|                                                                    |  | <i>Thermomicrobium</i> AY250886 93%  | 1                |            |            |            |            |            | 1           |            | 1           |
|                                                                    |  | <i>Veillonella</i> AF186071 91%      |                  |            |            |            | 1          |            |             | 1          | 1           |
|                                                                    |  | <i>Xanthomonadaceae</i> AJ619045 94% | 3                |            |            |            |            |            | 3           |            | 3           |
|                                                                    |  | <b>Subtotal</b>                      | <b>61</b>        | <b>16</b>  | <b>8</b>   | <b>8</b>   | <b>3</b>   | <b>2</b>   | <b>85</b>   | <b>13</b>  | <b>98</b>   |
| <b>Total number of clones examined</b>                             |  |                                      | <b>208</b>       | <b>204</b> | <b>202</b> | <b>204</b> | <b>203</b> | <b>200</b> | <b>614</b>  | <b>607</b> | <b>1221</b> |
| <b>Number of SLOTU detected</b>                                    |  |                                      | <b>67</b>        | <b>39</b>  | <b>46</b>  | <b>50</b>  | <b>54</b>  | <b>32</b>  | <b>119</b>  | <b>99</b>  | <b>182</b>  |
| <b>Number of SLOTU detected from both arms in the same subject</b> |  |                                      | <b>23</b>        | <b>10</b>  | <b>13</b>  | <b>12</b>  | <b>15</b>  | <b>8</b>   | <b>43</b>   | <b>31</b>  | <b>68</b>   |

\*Closest identity and % identity shown.
