# Supplementary material
Source: PubMed Central journal article supplement (PMC1815283)
Supplement: pnas_0607077104_4.pdf [file pnas_0607077104_4.pdf]

**Table 5. Representation of eubacterial phyla found on human topological surfaces**

| Phylum                   |                            | 16S rDNA clones sampled, % |                        |                      |                        |                         |
|--------------------------|----------------------------|----------------------------|------------------------|----------------------|------------------------|-------------------------|
|                          |                            | Outer surface              | Inner surface          |                      |                        |                         |
|                          |                            | Skin *                     | Mouth (1)              | Esophagus (2)        | Stomach (3)            | Colon (4)               |
|                          |                            | (n=1,221) <sup>#</sup>     | (n=2,522) <sup>#</sup> | (n=900) <sup>#</sup> | (n=1,833) <sup>#</sup> | (n=11,831) <sup>#</sup> |
| Common                   | <i>Actinobacteria</i>      | 51.43                      | 10.90                  | 4.33                 | 8.94                   | 0.19                    |
|                          | <i>Firmicutes</i>          | 23.75                      | 26.13                  | 69.57                | 25.31                  | 50.77                   |
|                          | <i>Proteobacteria</i>      | 19.41                      | 13.40                  | 2.22                 | 51.95                  | 0.62                    |
|                          | <i>Bacteroidetes</i>       | 1.56                       | 9.28                   | 20.22                | 10.53                  | 47.67                   |
|                          | Subtotal                   | 96.15                      | 59.71                  | 96.34                | 96.73                  | 99.25                   |
| Relatively site-specific | <i>Cyanobacteria</i>       | 0.16                       | 0                      | 0                    | 0                      | 0                       |
|                          | <i>Thermomicrobia</i>      | 0.08                       | 0                      | 0                    | 0                      | 0                       |
|                          | <i>Deinococcus-Thermus</i> | 2.87                       | 0                      | 0                    | 0.05                   | 0                       |
|                          | <i>Fusobacteria</i>        | 0                          | 14.00                  | 2.22                 | 3.06                   | 0.08                    |
|                          | <i>TM7</i>                 | 0                          | 1.35                   | 1.44                 | 0.11                   | 0                       |
|                          | <i>Deferribacteres</i>     | 0                          | 3.41                   | 0                    | 0.05                   | 0                       |
|                          | <i>Spirochaetes</i>        | 0                          | 21.29                  | 0                    | 0                      | 0                       |
|                          | <i>Verrucomicrobia</i>     | 0                          | 0                      | 0                    | 0                      | 0.64                    |
|                          | Unclassified               | 0.74                       | 0.24                   | 0                    | 0                      | 0.03                    |
|                          | Subtotal                   | 3.85                       | 40.29                  | 3.66                 | 3.27                   | 0.75                    |

\*: This study.

#: Number of clones characterized in the referenced study.

1. Paster BJ, Boches SK, Galvin JL, Ericson RE, Lau CN, Levanos VA, Sahasrabudhe A, Dewhirst FE (2001) *J Bacteriol* 183:3770-3783.

2. Pei Z, Bini EJ, Yang L, Zhou M, Francois F, Blaser MJ (2004) *Proc Natl Acad Sci USA* 101:4250-4255.

3. Bik EM, Eckburg PB, Gill SR, Nelson KE, Purdom EA, Francois F, Perez-Perez G, Blaser MJ, Relman DA (2006) *Proc Natl Acad Sci USA* 103:732-737.

4. Eckburg PB, Bik EM, Bernstein CN, Purdom E, Dethlefsen L, Sargent M, Gill SR, Nelson KE, Relman DA (2005) *Science* 308:1635-1638.
