# Supplementary material
Source: PubMed Central journal article supplement (PMC1815283)
Supplement: pnas_0607077104_5.pdf [file pnas_0607077104_5.pdf]

**Table 6. Genera detected in 1,221 16S rDNA clones from normal human skin**

| Genus <sup>#</sup>                   | SubA<br>(n=208) | SubB<br>(n=204) | SubC<br>(n=202) | SubD<br>(n=204) | SubE<br>(n=203) | SubF<br>(n=200) | Total (n=1221) |
|--------------------------------------|-----------------|-----------------|-----------------|-----------------|-----------------|-----------------|----------------|
| <i>Acetobacteraceae</i> *            | 2               |                 |                 |                 |                 |                 | 2              |
| <i>Acidovorax</i>                    |                 | 2               |                 |                 | 2               | 1               | 5              |
| <b><i>Acinetobacter</i></b>          | 3               | 14              | 14              | 10              | 1               | 3               | 45             |
| <i>Actinomyces</i>                   | 1               |                 | 4               |                 | 3               | 4               | 12             |
| <i>Actinomycetales</i> *             | 2               |                 |                 |                 |                 |                 | 2              |
| <i>Actinomycetales</i> AY770698 *    | 4               |                 | 2               |                 | 7               | 6               | 19             |
| <i>Alkanindiges</i>                  |                 | 5               |                 |                 |                 |                 | 5              |
| <i>Amaricoccus</i>                   | 1               |                 |                 |                 |                 |                 | 1              |
| <i>Anaerococcus</i>                  | 2               | 2               |                 | 2               | 1               | 4               | 11             |
| <i>Aquabacterium</i>                 |                 |                 | 2               |                 |                 |                 | 2              |
| <i>Atopobium</i>                     | 2               |                 |                 | 1               |                 |                 | 3              |
| <i>Bacteria</i> AJ619064 *           | 8               |                 |                 |                 |                 |                 | 8              |
| <i>Bacteria</i> *                    | 1               |                 |                 |                 |                 |                 | 1              |
| <i>Bacteroidales</i> AF385513 *      |                 |                 |                 |                 | 2               |                 | 2              |
| <i>Bdellovibrio</i>                  |                 |                 | 4               |                 |                 |                 | 4              |
| <i>Betaproteobacteria</i> AY360547 * |                 | 3               |                 |                 |                 |                 | 3              |
| <i>Bradyrhizobiaceae</i> U87763 *    |                 | 2               |                 |                 |                 |                 | 2              |
| <i>Brevibacterium</i>                |                 |                 |                 | 3               |                 |                 | 3              |
| <i>Brevundimonas</i>                 | 3               |                 |                 |                 |                 |                 | 3              |
| <i>Burkholderiales</i> DQ016727 *    | 1               | 3               |                 |                 |                 |                 | 4              |
| <i>Carnobacterium</i>                |                 | 10              |                 |                 |                 |                 | 10             |
| <i>Caulobacteraceae</i> AJ459874 *   |                 |                 |                 |                 | 1               |                 | 1              |
| <i>Chitinophaga</i>                  | 1               |                 |                 |                 |                 |                 | 1              |
| <i>Comamonadaceae</i> *              | 4               |                 |                 |                 |                 |                 | 4              |
| <b><i>Corynebacterium</i></b>        | 3               | 15              | 53              | 91              | 43              | 27              | 232            |
| <i>Cyanobacteria</i> *               |                 |                 | 2               |                 |                 |                 | 2              |
| <i>Deinococcus</i>                   | 35              |                 |                 |                 |                 |                 | 35             |
| <i>Dermacoccus</i>                   | 9               |                 | 1               |                 |                 |                 | 10             |
| <i>Dialister</i>                     |                 |                 |                 | 2               |                 |                 | 2              |
| <i>Diaphorobacter</i>                | 1               | 2               | 2               |                 | 2               |                 | 7              |
| <i>Enhydrobacter</i>                 | 9               | 10              | 15              |                 |                 |                 | 34             |
| <i>Enterobacter</i>                  |                 |                 | 1               |                 |                 |                 | 1              |
| <i>Enterococcus</i>                  |                 |                 | 2               |                 |                 |                 | 2              |
| <i>Eremococcus</i>                   |                 |                 |                 | 1               |                 |                 | 1              |
| <i>Facklamia</i>                     |                 |                 |                 | 5               | 2               |                 | 7              |

| Genus <sup>#</sup>                    | SubA<br>(n=208) | SubB<br>(n=204) | SubC<br>(n=202) | SubD<br>(n=204) | SubE<br>(n=203) | SubF<br>(n=200) | Total (n=1221) |
|---------------------------------------|-----------------|-----------------|-----------------|-----------------|-----------------|-----------------|----------------|
| <b><i>Finegoldia</i></b>              | 2               | 6               | 1               | 2               | 3               | 2               | 16             |
| <i>Flavobacteriaceae</i> AF502204 *   | 1               |                 |                 |                 |                 |                 | 1              |
| <i>Flexibacteraceae</i> *             | 1               |                 |                 |                 |                 |                 | 1              |
| <i>Gammaproteobacteria</i> AY922146 * |                 |                 |                 |                 |                 | 1               | 1              |
| <i>Gardnerella</i>                    |                 |                 | 3               |                 |                 |                 | 3              |
| <i>Gemella</i>                        |                 |                 |                 | 1               | 2               |                 | 3              |
| <i>Gordonia</i>                       | 11              |                 |                 |                 |                 |                 | 11             |
| <i>Granulicatella</i>                 |                 | 3               |                 |                 |                 |                 | 3              |
| <i>Haemophilus</i>                    | 1               | 2               | 2               |                 |                 | 2               | 7              |
| <i>Hymenobacter</i>                   |                 |                 |                 |                 | 2               |                 | 2              |
| <i>Hyphomicrobium</i>                 |                 |                 | 1               |                 |                 |                 | 1              |
| <i>Roseateles</i>                     |                 | 10              | 1               |                 | 1               |                 | 12             |
| <i>Janibacter</i>                     | 1               |                 |                 |                 |                 |                 | 1              |
| <i>Klebsiella</i>                     |                 | 4               |                 |                 |                 |                 | 4              |
| <i>Kocuria</i>                        | 2               | 3               | 6               |                 |                 |                 | 11             |
| <i>Lactobacillus</i>                  |                 | 9               | 3               |                 | 2               |                 | 14             |
| <i>Leuconostoc</i>                    |                 |                 | 1               |                 |                 |                 | 1              |
| <i>Methylobacterium</i>               | 4               |                 |                 |                 |                 |                 | 4              |
| <i>Methylophilus</i>                  |                 | 7               |                 |                 |                 |                 | 7              |
| <i>Micrococcus</i>                    |                 | 5               |                 |                 |                 | 1               | 6              |
| <i>Microcunatus</i>                   |                 |                 |                 | 1               |                 |                 | 1              |
| <i>Mobiluncus</i>                     | 1               |                 |                 |                 |                 |                 | 1              |
| <i>Mycobacterium</i>                  | 3               |                 |                 |                 |                 |                 | 3              |
| <i>Nakamurella</i>                    | 2               |                 |                 |                 |                 |                 | 2              |
| <i>Neisseria</i>                      | 1               |                 |                 |                 |                 |                 | 1              |
| <i>Neisseriaceae</i> AY225604 *       |                 | 17              |                 |                 | 1               |                 | 18             |
| <i>Nostocoida</i>                     | 1               |                 |                 |                 |                 |                 | 1              |
| <i>Paracoccus</i>                     | 1               |                 |                 |                 |                 |                 | 1              |
| <i>Pasteurellaceae</i> AJ290758 *     |                 |                 |                 |                 | 1               |                 | 1              |
| <i>Pasteurellaceae</i> AY005034 *     |                 |                 |                 |                 | 1               |                 | 1              |
| <i>Pedomicrobium</i>                  |                 | 4               |                 |                 |                 |                 | 4              |
| <i>Peptoniphilus</i>                  |                 |                 | 1               | 1               | 2               |                 | 4              |
| <i>Peptostreptococcus</i>             |                 |                 |                 | 1               |                 |                 | 1              |
| <i>Porphyromonas</i>                  |                 |                 |                 | 2               |                 |                 | 2              |
| <i>Prevotella</i>                     | 1               |                 |                 | 3               | 5               | 1               | 10             |
| <b><i>Propionibacterium</i></b>       | 22              | 25              | 25              | 30              | 47              | 119             | 268            |
| <i>Pseudomonadaceae</i> *             |                 | 4               |                 |                 |                 |                 | 4              |
| <i>Pseudomonas</i>                    |                 | 19              | 6               |                 | 6               | 2               | 33             |
| <i>Rhizobiales</i> *                  | 1               |                 |                 |                 |                 |                 | 1              |

| <b>Genus<sup>#</sup></b>      | <b>SubA<br/>(n=208)</b> | <b>SubB<br/>(n=204)</b> | <b>SubC<br/>(n=202)</b> | <b>SubD<br/>(n=204)</b> | <b>SubE<br/>(n=203)</b> | <b>SubF<br/>(n=200)</b> | <b>Total (n=1221)</b> |
|-------------------------------|-------------------------|-------------------------|-------------------------|-------------------------|-------------------------|-------------------------|-----------------------|
| <i>Rhizobiales</i> *          |                         |                         | 2                       |                         |                         |                         | 2                     |
| <i>Rhizobiales AF358012</i> * |                         |                         | 1                       |                         |                         |                         | 1                     |
| <i>Rhodococcus</i>            | 12                      |                         |                         |                         |                         |                         | 12                    |
| <i>Roseomonas</i>             |                         |                         |                         | 1                       |                         |                         | 1                     |
| <i>Rothia</i>                 | 13                      |                         | 1                       | 3                       | 4                       | 1                       | 22                    |
| <i>Selenomonas</i>            |                         |                         |                         |                         | 4                       |                         | 4                     |
| <i>Serratia</i>               |                         |                         |                         |                         | 2                       |                         | 2                     |
| <i>Sphingopyxis</i>           | 3                       |                         |                         |                         |                         | 1                       | 4                     |
| <b><i>Staphylococcus</i></b>  | 7                       | 6                       | 34                      | 38                      | 32                      | 19                      | 136                   |
| <i>Stenotrophomonas</i>       |                         |                         |                         |                         | 1                       |                         | 1                     |
| <b><i>Streptococcus</i></b>   | 16                      | 12                      | 12                      | 4                       | 22                      | 5                       | 71                    |
| <i>Tetrasphaera</i>           | 1                       |                         |                         |                         |                         |                         | 1                     |
| <i>Tsakamurella</i>           | 3                       |                         |                         |                         |                         |                         | 3                     |
| <i>Thermomicrobia</i>         | 1                       |                         |                         |                         |                         |                         | 1                     |
| <i>Veillonella</i>            | 1                       |                         |                         | 1                       | 1                       | 1                       | 4                     |
| <i>Xanthomonadaceae</i> *     | 3                       |                         |                         |                         |                         |                         | 3                     |
| <i>Zimmermannella</i>         |                         |                         |                         | 1                       |                         |                         | 1                     |

<sup>#</sup> Bold lettering indicates that the genus was found in all six subjects tested.

\*This sequence could not be classified at the genus level.
