# Supplementary material
Source: PubMed Central journal article supplement (PMC1815283)
Supplement: pnas_0607077104_6.pdf [file pnas_0607077104_6.pdf]

**Table 7. Species or SLOTU represented by 16S rDNA clones from normal forearm skin in  $\geq 4$  of the 6 subjects**

| Species                                     | No. of clones (%) |                 |                  |                  |                  |                  |                  |
|---------------------------------------------|-------------------|-----------------|------------------|------------------|------------------|------------------|------------------|
|                                             | SubA              | SubB            | SubC             | SubD             | SubE             | SubF             | Total            |
|                                             | <b>(n=208)</b>    | <b>(n=204)</b>  | <b>(n=202)</b>   | <b>(n=204)</b>   | <b>(n=203)</b>   | <b>(n=200)</b>   | <b>(n=1221)</b>  |
| <i>Propionibacterium acnes</i> *            | 22(10.6)          | 25(12.3)        | 25(12.4)         | 28(13.7)         | 42(20.7)         | 110(55.0)        | 252(20.6)        |
| <i>Corynebacterium tuberculostearicum</i> * | 3( 1.4)           | 3( 1.5)         | 19( 9.4)         | 29(14.2)         | 11( 5.4)         | 13( 6.5)         | 78( 6.4)         |
| <i>Streptococcus mitis</i> *                | 4( 1.9)           | 11( 5.4)        | 1( 0.5)          | 1( 0.5)          | 12( 5.9)         | 4( 2.0)          | 33( 2.7)         |
| <i>Finegoldia AB109769</i> *                | 2( 1.0)           | 6( 2.9)         | 1( 0.5)          | 2( 1.0)          | 3( 1.5)          | 2( 1.0)          | 16( 1.3)         |
| <i>Staphylococcus epidermidis</i>           | 0                 | 1( 0.5)         | 10( 5.0)         | 11( 5.4)         | 4( 2.0)          | 10( 5.0)         | 36( 2.9)         |
| <i>Acinetobacter junii</i>                  | 3( 1.4)           | 10( 4.9)        | 13( 6.4)         | 0                | 1( 0.5)          | 3( 1.5)          | 30( 2.5)         |
| <i>Staphylococcus hominis</i>               | 1( 0.5)           | 1( 0.5)         | 5( 2.5)          | 6( 2.9)          | 0                | 7( 3.5)          | 20( 1.6)         |
| <i>Staphylococcus caprae</i>                | 5( 2.4)           | 0               | 5( 2.5)          | 17( 8.3)         | 16( 7.9)         | 0                | 43( 3.5)         |
| <i>Corynebacterium mucifaciens</i>          | 0                 | 8( 3.9)         | 0                | 14( 6.9)         | 6( 3.0)          | 1( 0.5)          | 29( 2.4)         |
| <i>Corynebacterium amycolatum</i>           | 0                 | 2( 1.0)         | 18( 8.9)         | 2( 1.0)          | 1( 0.5)          | 0                | 23( 1.9)         |
| <i>Pseudomonas stutzeri</i>                 | 0                 | 11( 5.4)        | 5( 2.5)          | 0                | 4( 2.0)          | 1( 0.5)          | 21( 1.7)         |
| <i>Actinomycetales AY770698</i>             | 4( 1.9)           | 0               | 2( 1.0)          | 0                | 7( 3.4)          | 6( 3.0)          | 19( 1.6)         |
| <i>Streptococcus sanguinis</i>              | 7( 3.3)           | 1( 0.5)         | 8( 4.0)          | 3( 1.5)          | 0                | 0                | 19( 1.6)         |
| <i>Rothia mucilaginosa</i>                  | 10( 4.8)          | 0               | 0                | 3( 1.5)          | 4( 2.0)          | 1( 0.5)          | 18( 1.5)         |
| <i>Corynebacterium jeikeium</i>             | 0                 | 1( 0.5)         | 1( 0.5)          | 11( 5.4)         | 0                | 1( 0.5)          | 14( 1.1)         |
| <i>Diaphorobacter nitroreducens</i>         | 1( 0.5)           | 2( 1.0)         | 2( 1.0)          | 0                | 2( 1.0)          | 0                | 7( 0.6)          |
| <b>Total</b>                                | <b>62(29.8)</b>   | <b>82(40.2)</b> | <b>115(56.9)</b> | <b>127(62.3)</b> | <b>113(55.7)</b> | <b>159(79.5)</b> | <b>658(53.9)</b> |

\*Bold indicates identified in all six subjects.
