# Supplementary material
Source: PubMed Central journal article supplement (PMC1815283)
Supplement: pnas_0607077104_7.pdf [file pnas_0607077104_7.pdf]

**Table 8. Distribution of 1,221 16S rDNA clones from left and right forearm, by phylum**

| Phylum                        | % of total |       |                 |           |       |                   |           |       |          |           |       |                   |           |       |                   |           |       |          |
|-------------------------------|------------|-------|-----------------|-----------|-------|-------------------|-----------|-------|----------|-----------|-------|-------------------|-----------|-------|-------------------|-----------|-------|----------|
|                               | Subject A  |       |                 | Subject B |       |                   | Subject C |       |          | Subject D |       |                   | Subject E |       |                   | Subject F |       |          |
|                               | Left       | Right | $\Delta^{\#}$   | Left      | Right | $\Delta$          | Left      | Right | $\Delta$ | Left      | Right | $\Delta$          | Left      | Right | $\Delta$          | Left      | Right | $\Delta$ |
| <i>Actinobacteria</i>         | 45.7       | 43.7  | 2.0             | 28.2      | 18.8  | 9.4               | 48.5      | 45.5  | 3.0      | 75.2      | 52.4  | 22.8 <sup>†</sup> | 66.0      | 36.9  | 29.1 <sup>†</sup> | 73.5      | 84.7  | 11.2     |
| <i>Firmicutes</i>             | 9.5        | 17.5  | 8.0             | 17.5      | 29.7  | 12.2 <sup>†</sup> | 24.3      | 29.3  | 5.0      | 15.8      | 40.8  | 25.0 <sup>†</sup> | 23.0      | 46.6  | 23.6 <sup>†</sup> | 18.6      | 12.2  | 6.4      |
| <i>Proteobacteria</i>         | 20.0       | 16.5  | 3.5             | 54.4      | 51.5  | 2.9               | 27.2      | 23.2  | 4.0      | 4.0       | 6.8   | 2.8               | 10.0      | 8.7   | 1.3               | 6.9       | 3.1   | 3.8      |
| <i>Bacteroidales</i>          | 1.9        | 1.9   | 0               | 0         | 0     | NA                | 0         | 0     | NA       | 5.0       | 0     | 5.0               | 1.0       | 7.8   | 6.8               | 1.0       | 0     | 1.0      |
| <i>Deinococcus-Thermus</i>    | 19.0       | 14.6  | 4.4             | 0         | 0     | NA                | 0         | 0     | NA       | 0         | 0     | NA                | 0         | 0     | NA                | 0         | 0     | NA       |
| <i>Thermomicrobia</i>         | 0          | 1.0   | 1.0             | 0         | 0     | NA                | 0         | 0     | NA       | 0         | 0     | NA                | 0         | 0     | NA                | 0         | 0     | NA       |
| <i>Cyanobacteria</i>          | 0          | 0     | NA <sup>*</sup> | 0         | 0     | NA                | 0         | 2.0   | 2.0      | 0         | 0     | NA                | 0         | 0     | NA                | 0         | 0     | NA       |
| Unclassified                  | 3.8        | 3.9   | 0.1             | 0         | 0     | NA                | 0         | 0     | NA       | 0         | 0     | NA                | 0         | 0     | NA                | 0         | 0     | NA       |
| <b>Total Number of clones</b> | 105        | 103   |                 | 103       | 101   |                   | 103       | 99    |          | 101       | 103   |                   | 100       | 103   |                   | 102       | 98    |          |

<sup>#</sup>  $\Delta$ , difference in percent between left and right arms.

<sup>\*</sup> NA: not applicable

<sup>†</sup>  $P < 0.05$
