# Supplementary material
Source: PubMed Central journal article supplement (PMC1815283)
Supplement: pnas_0607077104_9.pdf [file pnas_0607077104_9.pdf]

**Table 10. New taxonomic units identified from resampling of four subjects**

| Category      | Description                                   | No. of clones | No. of subjects |
|---------------|-----------------------------------------------|---------------|-----------------|
| <b>Phylum</b> | <i>TM7</i>                                    | 6             | 2               |
|               | <i>Fusobacteria</i>                           | 1             | 1               |
|               | <b>Total</b>                                  | <b>7</b>      |                 |
| <b>Genus</b>  | <i>Flavobacteriaceae DQ337018<sup>#</sup></i> | 10            | 3               |
|               | <i>TM7</i>                                    | 6             | 2               |
|               | <i>Wautersia</i>                              | 2             | 2               |
|               | <i>Chryseobacterium</i>                       | 7             | 1               |
|               | <i>Flexibacteraceae<sup>#</sup></i>           | 7             | 1               |
|               | <i>Sphingomonas</i>                           | 4             | 1               |
|               | <i>Cyanobacteria<sup>#</sup></i>              | 3             | 1               |
|               | <i>Abiotrophia</i>                            | 2             | 1               |
|               | <i>Clostridiales AF287775<sup>#</sup></i>     | 2             | 1               |
|               | <i>Flavobacteriaceae<sup>#</sup></i>          | 2             | 1               |
|               | <i>Flexibacteraceae<sup>#</sup></i>           | 2             | 1               |
|               | <i>Rhizobium</i>                              | 2             | 1               |
|               | <i>Arsenicicoccus</i>                         | 1             | 1               |
|               | <i>Comamonas</i>                              | 1             | 1               |
|               | <i>Devosia</i>                                | 1             | 1               |
|               | <i>Enterobacteriaceae<sup>#</sup></i>         | 1             | 1               |
|               | <i>Flexibacteraceae<sup>a</sup></i>           | 1             | 1               |
|               | <i>Fusobacterium</i>                          | 1             | 1               |
|               | <i>Incertae sedis 5 DQ297980<sup>#</sup></i>  | 1             | 1               |
|               | <i>Janthinobacterium</i>                      | 1             | 1               |
|               | <i>Lachnospira</i>                            | 1             | 1               |
|               | <i>Lysobacter</i>                             | 1             | 1               |
|               | <i>Microbacterium</i>                         | 1             | 1               |
|               | <i>Neisseriaceae<sup>#</sup></i>              | 1             | 1               |
|               | <i>Novosphingobium</i>                        | 1             | 1               |
|               | <i>Ralstonia</i>                              | 1             | 1               |
|               | <i>Shigella</i>                               | 1             | 1               |
|               | <i>Xanthomonadaceae AB008508<sup>#</sup></i>  | 1             | 1               |
|               | <b>Total</b>                                  | <b>63</b>     |                 |
| <b>SLOTU</b>  | <i>Flavobacteriaceae DQ337018</i>             | 10            | 3               |
|               | <i>Streptococcus AF429766</i>                 | 8             | 3               |

| Category | Description                              | No. of clones | No. of subjects |
|----------|------------------------------------------|---------------|-----------------|
|          | <i>Wautersia metallidurans</i>           | 2             | 2               |
|          | <i>Acinetobacter calcoaceticus</i>       | 12            | 1               |
|          | <i>Tsukamurella pulmonis</i>             | 10            | 1               |
|          | <i>Flexibacteraceae</i> AM000023 (85%)*  | 7             | 1               |
|          | <i>Chryseobacterium</i> DQ314741         | 5             | 1               |
|          | <i>Acinetobacter</i> DQ337025            | 4             | 1               |
|          | <i>Alkanindiges</i> AY251390 (94%)*      | 3             | 1               |
|          | <i>Cyanobacteria</i> AY853673 (83%)*     | 3             | 1               |
|          | <i>Abiotrophia defectiva</i>             | 2             | 1               |
|          | <i>Anaerococcus</i> Y07841 (95%)*        | 2             | 1               |
|          | <i>Anaerococcus</i> AY958826             | 2             | 1               |
|          | <i>Aquabacterium</i> AY212659            | 2             | 1               |
|          | <i>Chryseobacterium</i> AJ619057 (96%)*  | 2             | 1               |
|          | <i>Clostridiales</i> AF287775            | 2             | 1               |
|          | <i>Corynebacterium thomssenii</i>        | 2             | 1               |
|          | <i>Deinococcus</i> AY743261 (93%)*       | 2             | 1               |
|          | <i>Deinococcus grandis</i>               | 2             | 1               |
|          | <i>Deinococcus radiodurans</i>           | 2             | 1               |
|          | <i>Flavobacteriaceae</i> DQ256356 (94%)* | 2             | 1               |
|          | <i>Flexibacteraceae</i> AM000023 (89%)*  | 2             | 1               |
|          | <i>Granulicatella adiacens</i>           | 2             | 1               |
|          | <i>Haemophilus</i> AY005033              | 2             | 1               |
|          | <i>Rhizobium giardinii</i>               | 2             | 1               |
|          | <i>Sphingomonas oligophenolica</i>       | 2             | 1               |
|          | <i>Sphingomonas taejonensis</i>          | 2             | 1               |
|          | <i>Staphylococcus lugdunensis</i>        | 2             | 1               |
|          | <i>Staphylococcus pasteurii</i>          | 2             | 1               |
|          | TM7 DQ248299 (95%)                       | 2             | 1               |
|          | TM7 phylum sp. oral clone DR034          | 2             | 1               |
|          | <i>Acinetobacter parvus</i>              | 1             | 1               |
|          | <i>Actinomyces odontolyticus</i>         | 1             | 1               |
|          | <i>Anaerococcus</i> AY542229             | 1             | 1               |
|          | <i>Arsenicococcus bolidensis</i>         | 1             | 1               |
|          | <i>Bdellovibrio</i> DQ413094 (90%)*      | 1             | 1               |
|          | <i>Comamonas denitrificans</i>           | 1             | 1               |
|          | <i>Devosia</i> AJ863377                  | 1             | 1               |
|          | <i>Enterobacter aerogenes</i>            | 1             | 1               |
|          | <i>Flexibacteraceae</i> AM000023 (91%)*  | 1             | 1               |

| Category | Description                                               | No. of clones | No. of subjects |
|----------|-----------------------------------------------------------|---------------|-----------------|
|          | <i>Fusobacterium</i> AY278617                             | 1             | 1               |
|          | <i>Incertae sedis</i> DQ297980                            | 1             | 1               |
|          | <i>Janthinobacterium lividum</i>                          | 1             | 1               |
|          | <i>Lachnospira</i> AY977894                               | 1             | 1               |
|          | <i>Lactobacillus delbrueckii</i> subsp. <i>bulgaricus</i> | 1             | 1               |
|          | <i>Lysobacter</i> AY074793 (94%)*                         | 1             | 1               |
|          | <i>Methylobacterium</i> Z23159                            | 1             | 1               |
|          | <i>Microbacterium lacticum</i>                            | 1             | 1               |
|          | <i>Neisseria</i> AJ239301                                 | 1             | 1               |
|          | <i>Neisseriaceae</i> AY225604 (91%)*                      | 1             | 1               |
|          | <i>Novosphingobium subterraneum</i>                       | 1             | 1               |
|          | <i>Paracoccus aminovorans</i>                             | 1             | 1               |
|          | <i>Propionibacterium</i> AB042290                         | 1             | 1               |
|          | <i>Pseudomonas costantinii</i>                            | 1             | 1               |
|          | <i>Pseudomonas monteilii</i>                              | 1             | 1               |
|          | <i>Ralstonia insidiosa</i>                                | 1             | 1               |
|          | <i>Shigella dysenteriae</i>                               | 1             | 1               |
|          | <i>Sphingomonas</i> AJ555475                              | 1             | 1               |
|          | <i>Sphingomonas yabuuchiae</i>                            | 1             | 1               |
|          | <i>Streptococcus australis</i>                            | 1             | 1               |
|          | <i>Streptococcus</i> AY959092                             | 1             | 1               |
|          | <i>Streptococcus pseudopneumoniae</i>                     | 1             | 1               |
|          | TM7 AY349415                                              | 1             | 1               |
|          | TM7 AB195911 (94%)*                                       | 1             | 1               |
|          | <i>Xanthomonadaceae</i> AB008508                          | 1             | 1               |
|          | <b>Total</b>                                              | <b>140</b>    |                 |

#This sequence could not be classified at the genus level.

\*Number in parentheses represents similarity to closest sequence in GenBank.
