# Supplementary material
Source: PubMed Central journal article supplement (PMC1815283)
Supplement: pnas_0607077104_10.pdf [file pnas_0607077104_10.pdf]

**Table 11. Pair-wise  $P$  values of  $P$  test analysis in bacterial population distribution in 20 samples from six persons**

| .   | AL   | AL2  | AR   | AR2  | BL   | BR   | CL   | CL2  | CR   | CR2  | DL   | DR   | EL   | EL2  | ER   | ER2  | FL   | FL2  | FR   |
|-----|------|------|------|------|------|------|------|------|------|------|------|------|------|------|------|------|------|------|------|
| AL2 | 0.43 |      |      |      |      |      |      |      |      |      |      |      |      |      |      |      |      |      |      |
| AR  | 0.53 | 0.26 |      |      |      |      |      |      |      |      |      |      |      |      |      |      |      |      |      |
| AR2 | ***  | 0.18 | 0.44 |      |      |      |      |      |      |      |      |      |      |      |      |      |      |      |      |
| BL  | ***  | ***  | ***  | ***  |      |      |      |      |      |      |      |      |      |      |      |      |      |      |      |
| BR  | ***  | ***  | ***  | ***  | 0.39 |      |      |      |      |      |      |      |      |      |      |      |      |      |      |
| CL  | ***  | ***  | ***  | ***  | 0.08 | 0.19 |      |      |      |      |      |      |      |      |      |      |      |      |      |
| CL2 | ***  | ***  | ***  | ***  | 0.46 | 0.19 | 0.10 |      |      |      |      |      |      |      |      |      |      |      |      |
| CR  | ***  | ***  | ***  | ***  | ***  | ***  | 0.34 | ***  |      |      |      |      |      |      |      |      |      |      |      |
| CR2 | ***  | ***  | ***  | ***  | 0.23 | 0.08 | ***  | ***  | 0.25 |      |      |      |      |      |      |      |      |      |      |
| DL  | ***  | ***  | ***  | ***  | ***  | ***  | ***  | ***  | 0.12 | ***  |      |      |      |      |      |      |      |      |      |
| DR  | ***  | ***  | ***  | ***  | ***  | ***  | ***  | ***  | ***  | ***  | 0.36 |      |      |      |      |      |      |      |      |
| EL  | ***  | ***  | ***  | ***  | 0.11 | 0.09 | 0.96 | 0.08 | 0.57 | 0.34 | 0.14 | ***  |      |      |      |      |      |      |      |
| EL2 | ***  | ***  | ***  | 0.09 | 0.12 | 0.14 | 0.55 | ***  | 1.00 | 0.50 | 0.77 | 0.60 | 0.74 |      |      |      |      |      |      |
| ER  | ***  | ***  | ***  | ***  | ***  | ***  | 0.39 | 0.08 | 0.82 | 0.07 | 0.51 | 0.24 | 0.76 | 0.57 |      |      |      |      |      |
| ER2 | ***  | ***  | 0.08 | ***  | 0.38 | ***  | 0.92 | 0.39 | ***  | 0.07 | ***  | ***  | 0.83 | 0.50 | ***  |      |      |      |      |
| FL  | ***  | ***  | ***  | 0.07 | 0.08 | ***  | 0.70 | ***  | 0.69 | ***  | 0.54 | 0.11 | 0.92 | 0.32 | 0.84 | 0.37 |      |      |      |
| FL2 | ***  | ***  | ***  | ***  | 0.09 | ***  | 0.49 | ***  | 0.66 | ***  | 0.32 | 0.17 | 0.37 | 0.32 | 0.51 | ***  | 0.51 |      |      |
| FR  | ***  | ***  | ***  | ***  | 0.36 | 0.08 | 0.47 | 0.10 | 0.70 | ***  | 0.62 | 0.68 | 0.26 | 0.90 | 1.00 | 0.11 | 0.41 | 0.69 |      |
| FR2 | ***  | ***  | ***  | ***  | 0.82 | ***  | 0.84 | 0.08 | 0.53 | 0.06 | 0.06 | 0.46 | 0.78 | 0.43 | 0.67 | 0.20 | 0.50 | 0.20 | 1.00 |

\*\*\*,  $P < 0.05$ . All  $P$  values  $\geq 0.05$  indicate that populations are not significantly different at the 5% level.
